# Supplementary material for: Tunable magnetism and electron correlation in titanium-based Kagome metals RETi3Bi4 (RE = Yb, Pr, and Nd) by rare-earth engineering
Source: Research Square preprint supplement (doi:10.21203/rs.3.rs-3318771/v1), 2023-10-02
Supplement: Supplementary file 1 [file bb152af1a797fa5a01faa1d5.docx]

**Supporting Information for Publication**

**Tunable magnetism and electron correlation in titanium-based Kagome metals RETi3Bi4 (RE = Yb, Pr, and Nd) by rare-earth engineering**

Long Chen1, 2, #, Ying Zhou1, 2, #, He Zhang1, 2, #, Xuecong Ji1, 2, #, Ke Liao1, 2, Yu Ji1, 2, Ying Li1, Zhongnan Guo3, Xi Shen1, Richeng Yu1, 2, 4, Xiaohui Yu1, 2, 4, *, Hongming Weng1, 2, 4, *, Gang Wang1, 2, 4, *

1 Beijing National Laboratory for Condensed Matter Physics, Institute of Physics, Chinese Academy of Sciences, Beijing 100190, China

2 University of Chinese Academy of Sciences, Beijing 100049, China

3 Department of Chemistry, School of Chemistry and Biological Engineering, University of Science and Technology Beijing, Beijing 100083, China

4 Songshan Lake Materials Laboratory, Dongguan, Guangdong 523808, China

# These authors contributed equally to this work.

*****Corresponding author. Email: yuxh@iphy.ac.cn; hmweng@iphy.ac.cn; gangwang@iphy.ac.cn.

**Table S1**. Crystallographic data and structure refinement of RETi3Bi4 (RE = Yb, Pr, and Nd).

| Empirical formula | | YbTi3Bi4** | PrTi3Bi4 | NdTi3Bi4 |
| --- | --- | --- | --- | --- |
| f.u. weight (g/mol) | | 1152.7 | 1120.6 | 1120.6 |
| Space group / Z | | *Fmmm* (No.69) / 4 | | |
| Unit cell parameter | *a* (Å) | 24.9(4) | 24.9668(114) | 24.9523(87) |
| *b* (Å) | 10.3(4) | 10.3248(49) | 10.3327(27) |
| *c* (Å) | 5.9(2) | 5.9125(26) | 5.9009(18) |
| *α, β, γ*(°) | 90 | 90 | 90 |
| V (Å3) | 1513.17(3) | 1524.108(2.0) | 1521.4 (1.9) |
| *d*cal (g/cm3) | | -- | 4.883 | 4.883 |
| Refl. Collectd / unique | | -- | 2477 / 364 | 2013 / 346 |
| *R*int | | -- | 0.0723 | 0.0623 |
| Goodness-of-fit | | -- | 1.5212 | 1.435 |
| *R1 / wR2* (*I* > 2*σ*(*I*)) | | -- | 0.0473 / 0.0887 | 0.0461 / 0.0884 |
| *R1 / wR2* (all) | | -- | 0.0723 / 0.0989 | 0.0644 / 0.0963 |

** Due to the two-dimensional feature of YbTi3Bi4, the collected single crystal X-ray diffraction data cannot be used to do the refinement. Here we present the indexed unit cell parameters. The crystal structure of YbTi3Bi4 is determined by scanning transmission electron microscopy as shown in the manuscript.

**Table S2**. Atomic coordinates and equivalent isotropic displacement parameters for PrTi3Bi4.

| Atom | *Wyck.* | *Sym.* | *x/a* | *y/b* | *z/c* | *Occ.* | *U*(eq)(Å2) |
| --- | --- | --- | --- | --- | --- | --- | --- |
| Pr | 8*g* | 2*mm* | 0.6954(1) | 0 | 0 | 1.0 | 0.0262(8) |
| Ti1 | 8*g* | *m* | 0.5926(3) | 0 | -0.5000 | 1.0 | 0.0250(2) |
| Ti2 | 16*l* | *m* | 0.5933(3) | 0.2500 | -0.2500 | 1.0 | 0.0290(2) |
| Bi1 | 8*h* | *m* | 0.5000 | 0.1693(1) | -0.5000 | 1.0 | 0.0263(6) |
| Bi2 | 16*o* | *m* | 0.6877(1) | 0.1613(1) | -0.5000 | 1.0 | 0.0263(4) |
| Bi3 | 8*g* | *m* | 0.5682(1) | 0.5000 | 0.5000 | 1.0 | 0.0271(6) |

**Table S3**. Anisotropic displacement parameters for PrTi3Bi4. The anisotropic displacement factor exponent takes the form: -2π2[h2a2U11 + ... + 2hkabU12].

| Atom | *U11* (Å2) | *U22* (Å2) | *U33* (Å2) | *U23* (Å2) | *U13* (Å2) | *U12* (Å2) |
| --- | --- | --- | --- | --- | --- | --- |
| Pr | 0.0480(18) | 0.0076(7) | 0.0230(13) | 0 | 0 | 0 |
| Ti1 | 0.0400(60) | 0.0080(20) | 0.0280(40) | 0 | 0 | 0 |
| Ti2 | 0.0630(50) | 0.0083(17) | 0.0160(30) | 0 | 0 | -0.0021(14) |
| Bi1 | 0.0462(13) | 0.0080(50) | 0.0246(10) | 0 | 0 | 0 |
| Bi2 | 0.0493(10) | 0.0071(4) | 0.0226(7) | -0.0002(3) | 0 | 0 |
| Bi3 | 0.0568(14) | 0.0053(5) | 0.0192(8) | 0 | 0 | 0 |

**Table S4**. Atomic coordinates and equivalent isotropic displacement parameters for NdTi3Bi4.

| Atom | *Wyck.* | *Sym.* | *x/a* | *y/b* | *z/c* | *Occ.* | *U*(eq)(Å2) |
| --- | --- | --- | --- | --- | --- | --- | --- |
| Nd | 8*g* | 2*mm* | 0.30408(8) | 0 | 0.5000 | 1.0 | 0.0142(6) |
| Ti1 | 8*g* | *m* | 0.4071(3) | 0.5000 | 0.5000 | 1.0 | 0.0140(20) |
| Ti2 | 16*l* | *m* | 0.4053(2) | 0.7500 | 0.7500 | 1.0 | 0.0192(17) |
| Bi1 | 8*h* | *m* | 0.5000 | 0.6694(1) | 0.5000 | 1.0 | 0.0143(5) |
| Bi2 | 16*o* | *m* | 0.3118(1) | 0.6606(1) | 0.5000 | 1.0 | 0.0139(4) |
| Bi3 | 8*g* | *m* | 0.43123(5) | 0 | 0.5000 | 1.0 | 0.0144(5) |

**Table S5**. Anisotropic displacement parameters for NdTi3Bi4. The anisotropic displacement factor exponent takes the form: -2π2[h2a2U11 + ... + 2hkabU12].

| Atom | *U11* (Å2) | *U22* (Å2) | *U33* (Å2) | *U23* (Å2) | *U13* (Å2) | *U12* (Å2) |
| --- | --- | --- | --- | --- | --- | --- |
| Nd | 0.0202(12) | 0.0104(8) | 0.0119(12) | 0 | 0 | 0 |
| Ti1 | 0.029(5) | 0.011(3) | 0.003(4) | 0 | 0 | 0 |
| Ti2 | 0.047(4) | 0.0047(17) | 0.006(3) | 0 | 0 | 0.0013(17) |
| Bi1 | 0.0214(9) | 0.0076(5) | 0.0138(9) | 0 | 0 | 0 |
| Bi2 | 0.0215(8) | 0.0006(2) | 0.0072(5) | 0.0131(7) | 0 | 0 |
| Bi3 | 0.0253(9) | 0.0051(5) | 0.0127(9) | 0 | 0 | 0 |

**Table S6.** Quantitative analysis of elemental composition for YbTi3Bi4 single crystals. For each sample, the molar ratio of composed elements is measured at three different locations. The stoichiometry of YbTi3Bi4 is determined to be Yb : Ti : Bi = 0.85(3) : 3.00(5) : 4.04(3) by the statistical average and standard deviation (SD) of the overall energy-dispersive spectroscopy (EDS) data.

| Atom | Yb (Mol.%) | Ti (Mol.%) | Bi (Mol.%) |
| --- | --- | --- | --- |
| SA#-1 | 10.62 | 38.02 | 51.36 |
| SA#-2 | 11.37 | 37.37 | 51.26 |
| SA#-3 | 10.74 | 37.74 | 51.51 |
| SB#-1 | 11.07 | 37.03 | 51.90 |
| SB#-2 | 10.30 | 39.07 | 50.63 |
| SB#-3 | 10.74 | 37.90 | 51.36 |
| SC#-1 | 11.39 | 37.78 | 50.83 |
| SC#-2 | 10.26 | 38.65 | 51.08 |
| SC#-3 | 10.79 | 38.29 | 50.93 |
| Average | 10.81 | 37.98 | 51.21 |
| SD | 0.41 | 0.62 | 0.39 |

**Table S7.** Quantitative analysis of elemental composition for PrTi3Bi4 single crystals. The final stoichiometry of PrTi3Bi4 is determined to be Pr : Ti : Bi = 1.00(3) : 3.06(7) : 3.99(8).

| Atom | Pr (Mol.%) | Ti (Mol.%) | Bi (Mol.%) |
| --- | --- | --- | --- |
| SA#-1 | 12.82 | 37.61 | 49.57 |
| SA#-2 | 11.79 | 38.65 | 49.56 |
| SA#-3 | 12.33 | 36.42 | 51.25 |
| SB#-1 | 12.28 | 36.98 | 50.74 |
| SB#-2 | 12.87 | 38.66 | 48.47 |
| SB#-3 | 12.72 | 39.03 | 48.25 |
| SC#-1 | 11.99 | 38.99 | 49.02 |
| SC#-2 | 12.92 | 37.49 | 49.59 |
| SC#-3 | 12.12 | 38.28 | 49.60 |
| Average | 12.43 | 38.01 | 49.56 |
| SD | 0.42 | 0.93 | 0.97 |

**Table S8.** Quantitative analysis of elemental composition for NdTi3Bi4 single crystals. The final stoichiometry of NdTi3Bi4 is determined to be Nd : Ti : Bi = 1.00(4) : 3.02(5) : 3.92(5).

| Atom | Nd (Mol.%) | Ti (Mol.%) | Bi (Mol.%) |
| --- | --- | --- | --- |
| SA#-1 | 13.14 | 37.81 | 49.05 |
| SA#-2 | 11.69 | 37.96 | 50.35 |
| SA#-3 | 12.27 | 38.72 | 49.01 |
| SB#-1 | 12.53 | 37.20 | 50.27 |
| SB#-2 | 11.94 | 38.58 | 49.48 |
| SB#-3 | 12.55 | 37.93 | 49.52 |
| SC#-1 | 12.93 | 38.57 | 48.50 |
| SC#-2 | 13.18 | 38.41 | 48.41 |
| SC#-3 | 13.10 | 37.24 | 49.66 |
| Average | 12.59 | 38.05 | 49.36 |
| SD | 0.54 | 0.57 | 0.69 |

**Table S9**. Fitted parameters of magnetic susceptibility for RETi3Bi4 using Curie-Weiss law.

| RE | Yb | | Pr | | Nd | |
| --- | --- | --- | --- | --- | --- | --- |
| Field configuration | *H // bc* | *H* ⊥ *bc* | *H* // *bc* | *H* ⊥ *bc* | *H* // *bc* | *H* ⊥ *bc* |
| *χ0* (10-4 emu mol-1 Oe-1) | 0.36(1) | 2.29(6) | -6.50(4) | -32.2(1) | 0.21(4) | 2.17(2) |
| *C* (10-3 emu mol-1 Oe-1 K-1) | 9.59(5) | 3.11(2) | 1.68(5) | 2.78(8) | 1.58(3) | 1.70(1) |
| *θ* (K) | 0.55(1) | 0.55(1) | 2.50(1) | -100(1) | -3.62(3) | -36.7(3) |
| *μeff* (*μB*/f.u.) | 0.28(1) | 0.16(1) | 3.66(5) | 4.72(7) | 3.58(6) | 3.69(1) |
| *μsat* at 7 T (*μB*/ f.u.) | 0.016 | 0.006 | 1.620 | 0.855 | 1.426 | 0.587 |

**Table S10**. Fitted parameters of resistivity using Power law and those of specific heat capacity using Debye model for RETi3Bi4.

| RE | Yb | Pr | Nd | Nd |
| --- | --- | --- | --- | --- |
| *T*anomaly or *T*c | - | ~8.2 K | 8.5 K | 8.5 K |
| *T*min - *T*max | 2 K - 45 K | 10 K - 45 K | 10 K - 45 K | 2 K - 9 K |
| *ρ0* (10-5 Ω cm) | 2.62(1) | 3.68(3) | 3.79(1) | 3.45(1) |
| *A* (10-9 Ω cm K-α) | 2.36(29) | 8.07(1.02) | 2.56(28) | 0.00329(6) |
| *α* | 2.00(3) | 1.64(3) | 1.51(2) | 5.35(8) |
| *T*min - *T*max | 2 K - 7 K | 12 K - 18 K | 12 K - 18 K | |
| *γ* (mJ mol-1 K-2) | 20.7(7) | 762.6(8.9) | 809.6(7.5) | |

**Table S11**. Fitted parameters of resistance for NdTi3Bi4 under high pressure using Power law (10 K - 45 K).

| Pressure (GPa) | *R0* (Ω) | *A* (10-5 Ω K-α) | *α* |
| --- | --- | --- | --- |
| 1.5 | 0.06853(4) | 3.65(17) | 1.539(12) |
| 2.6 | 0.06900(2) | 3.75(9) | 1.530(6) |
| 3.8 | 0.06924(2) | 3.09(7) | 1.546(6) |
| 5.4 | 0.07044(2) | 3.12(10) | 1.544(8) |
| 7.7 | 0.07141(3) | 2.97(13) | 1.554(11) |
| 10.2 | 0.07180(3) | 2.89(13) | 1.556(12) |
| 12.4 | 0.07111(4) | 2.48(15) | 1.594(16) |
| 15.4 | 0.07237(4) | 2.03(14) | 1.640(18) |
| 18.9 | 0.07585(4) | 1.07(10) | 1.802(26) |
| 23.3 | 0.07975(4) | 1.12(11) | 1.794(26) |
| 28.1 | 0.08467(4) | 1.02(10) | 1.818(25) |
| 32.4 | 0.08675(5) | 9.21(10) | 1.854(28) |
| 37.0 | 0.08938(5) | 1.19(13) | 1.810(28) |
| 41.9 | 0.09137(6) | 1.42(15) | 1.786(27) |


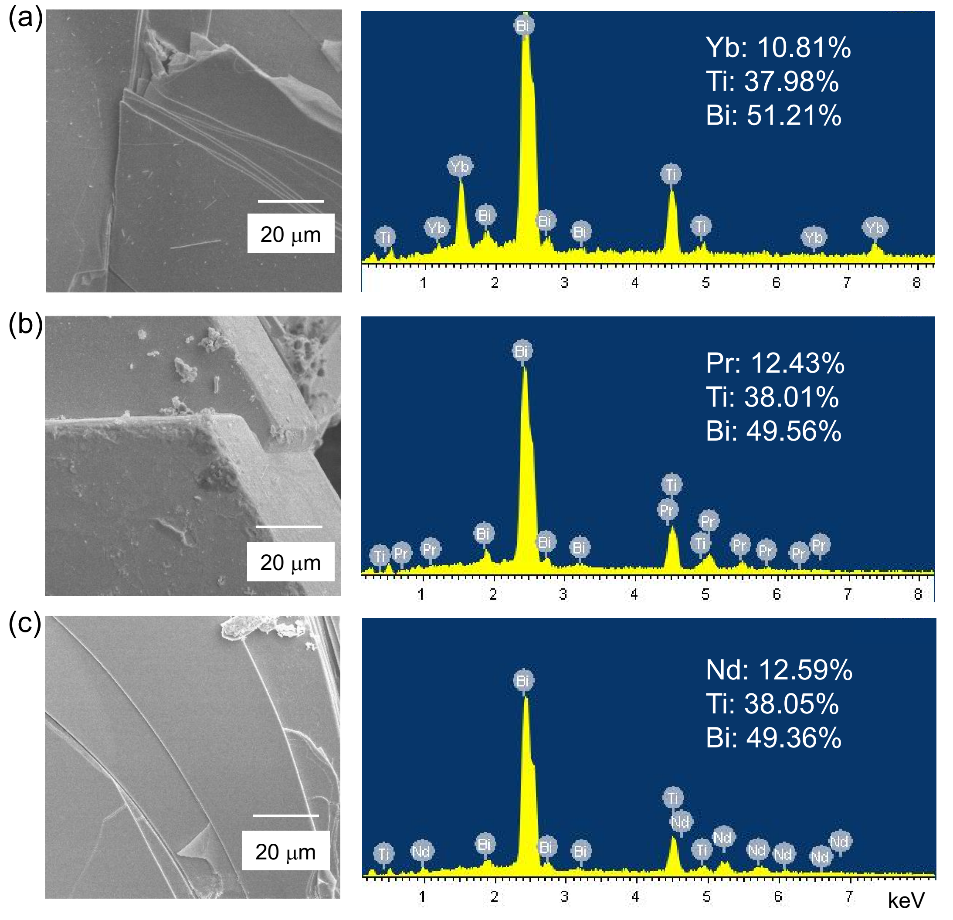


**Figure S1.** Scanning electron microscope images and typical EDSs collected on the flat clean surface of (a) YbTi3Bi4, (b) PrTi3Bi4, and (c) NdTi3Bi4 single crystals, showing clean surface with hexagonal shape and two-dimensional feature.


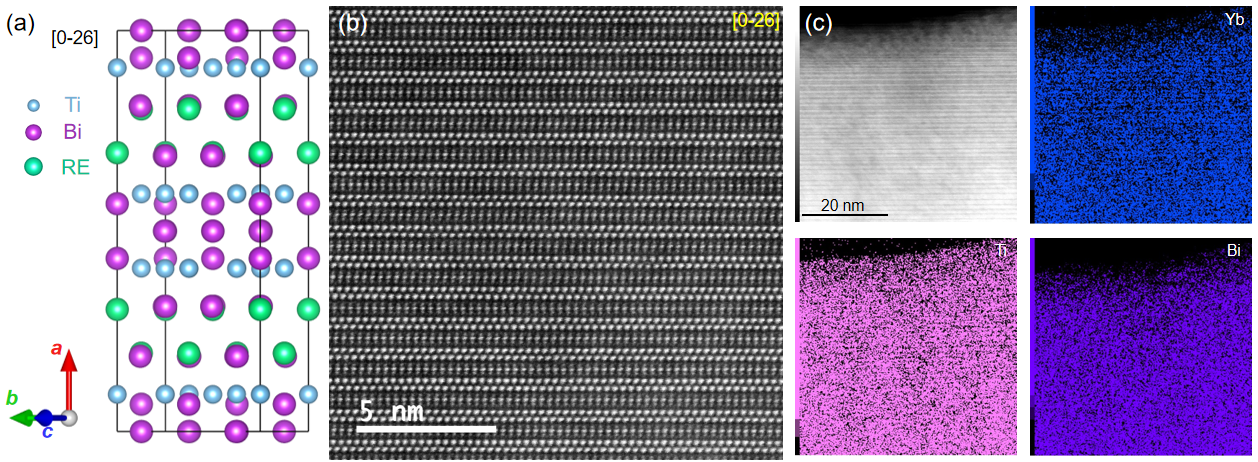


**Figure S2.** (a) Crystal structure and (b) high-angle annular dark-field image of YbTi3Bi4 along the [0-26] zone axis. (c) EDS mapping of YbTi3Bi4 collected on a 20 nm scale bar, showing the homogenous distribution of Yb, Ti, and Bi elements

**
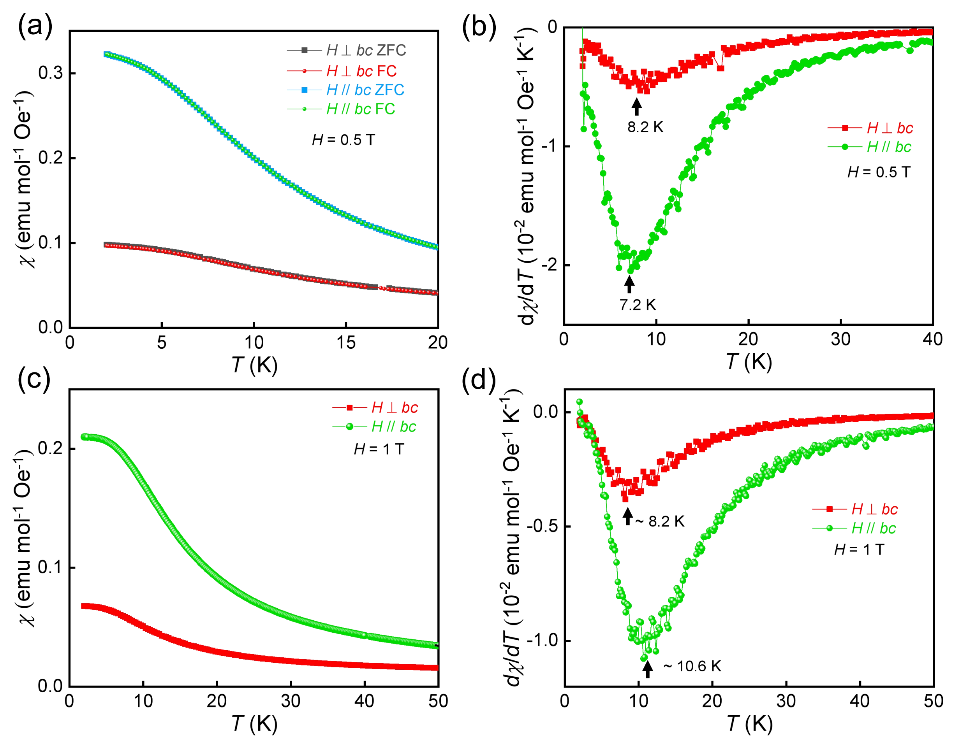
**

**Figure S3.** (a) Magnetic susceptibility and (b) first derivative of magnetic susceptibility (*dχ*/*dT*) for PrTi3Bi4 at low temperature under 0.5 T. (c) Magnetic susceptibility and (d) first derivative of magnetic susceptibility (*dχ*/*dT*) for PrTi3Bi4 at low temperature under 1 T.

**
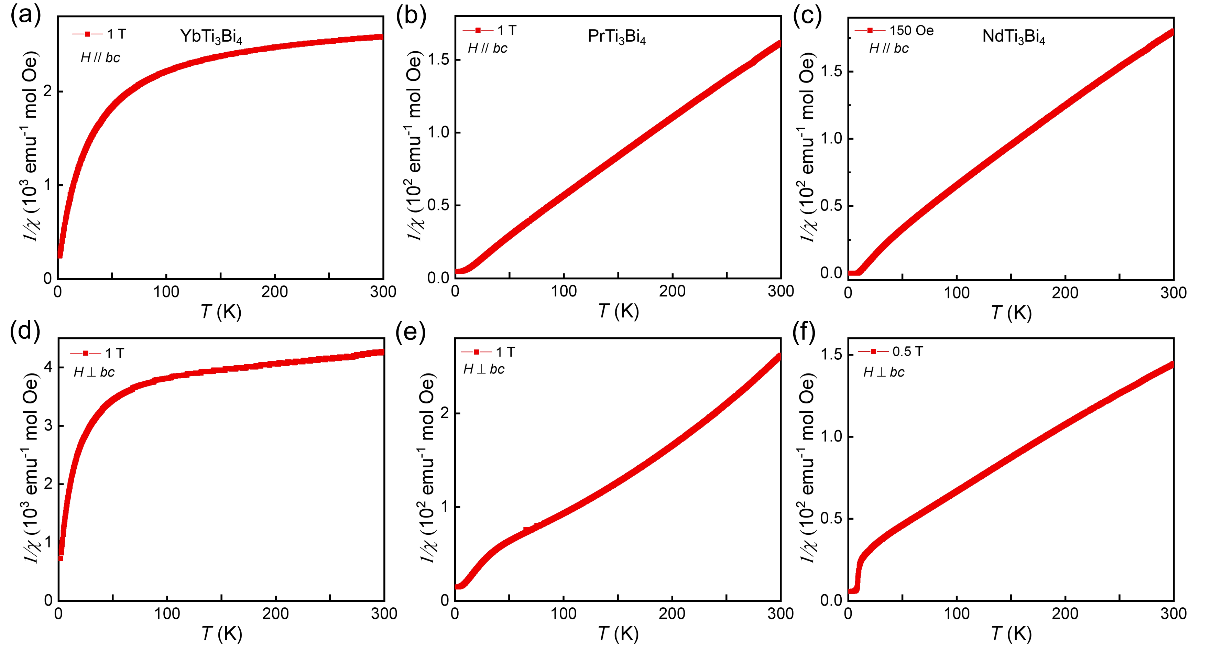
**

**Figure S4.** 1/*χ* vs. *T* plot with magnetic field parallel to the *bc* plane of (a) YbTi3Bi4, (b) PrTi3Bi4, and (c) NdTi3Bi4 single crystal. 1/*χ* vs. *T* plot with magnetic field perpendicular to the *bc* plane of (a) YbTi3Bi4, (b) PrTi3Bi4, and (c) NdTi3Bi4 single crystal.

**
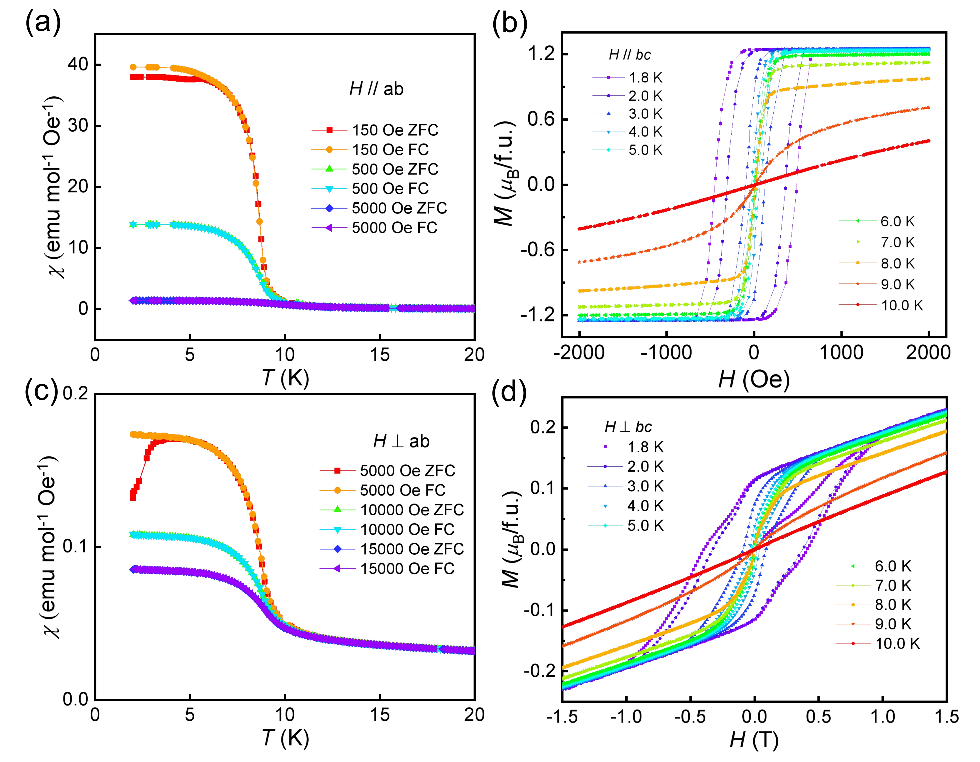
**

**Figure S5.** Magnetic susceptibility of NdTi3Bi4 under different magnetic field (a) parallel and (c) perpendicular to the *bc* plane. Field-dependent magnetization of NdTi3Bi4 at different temperature under magnetic field (b) parallel and (d) perpendicular to the *bc* plane.


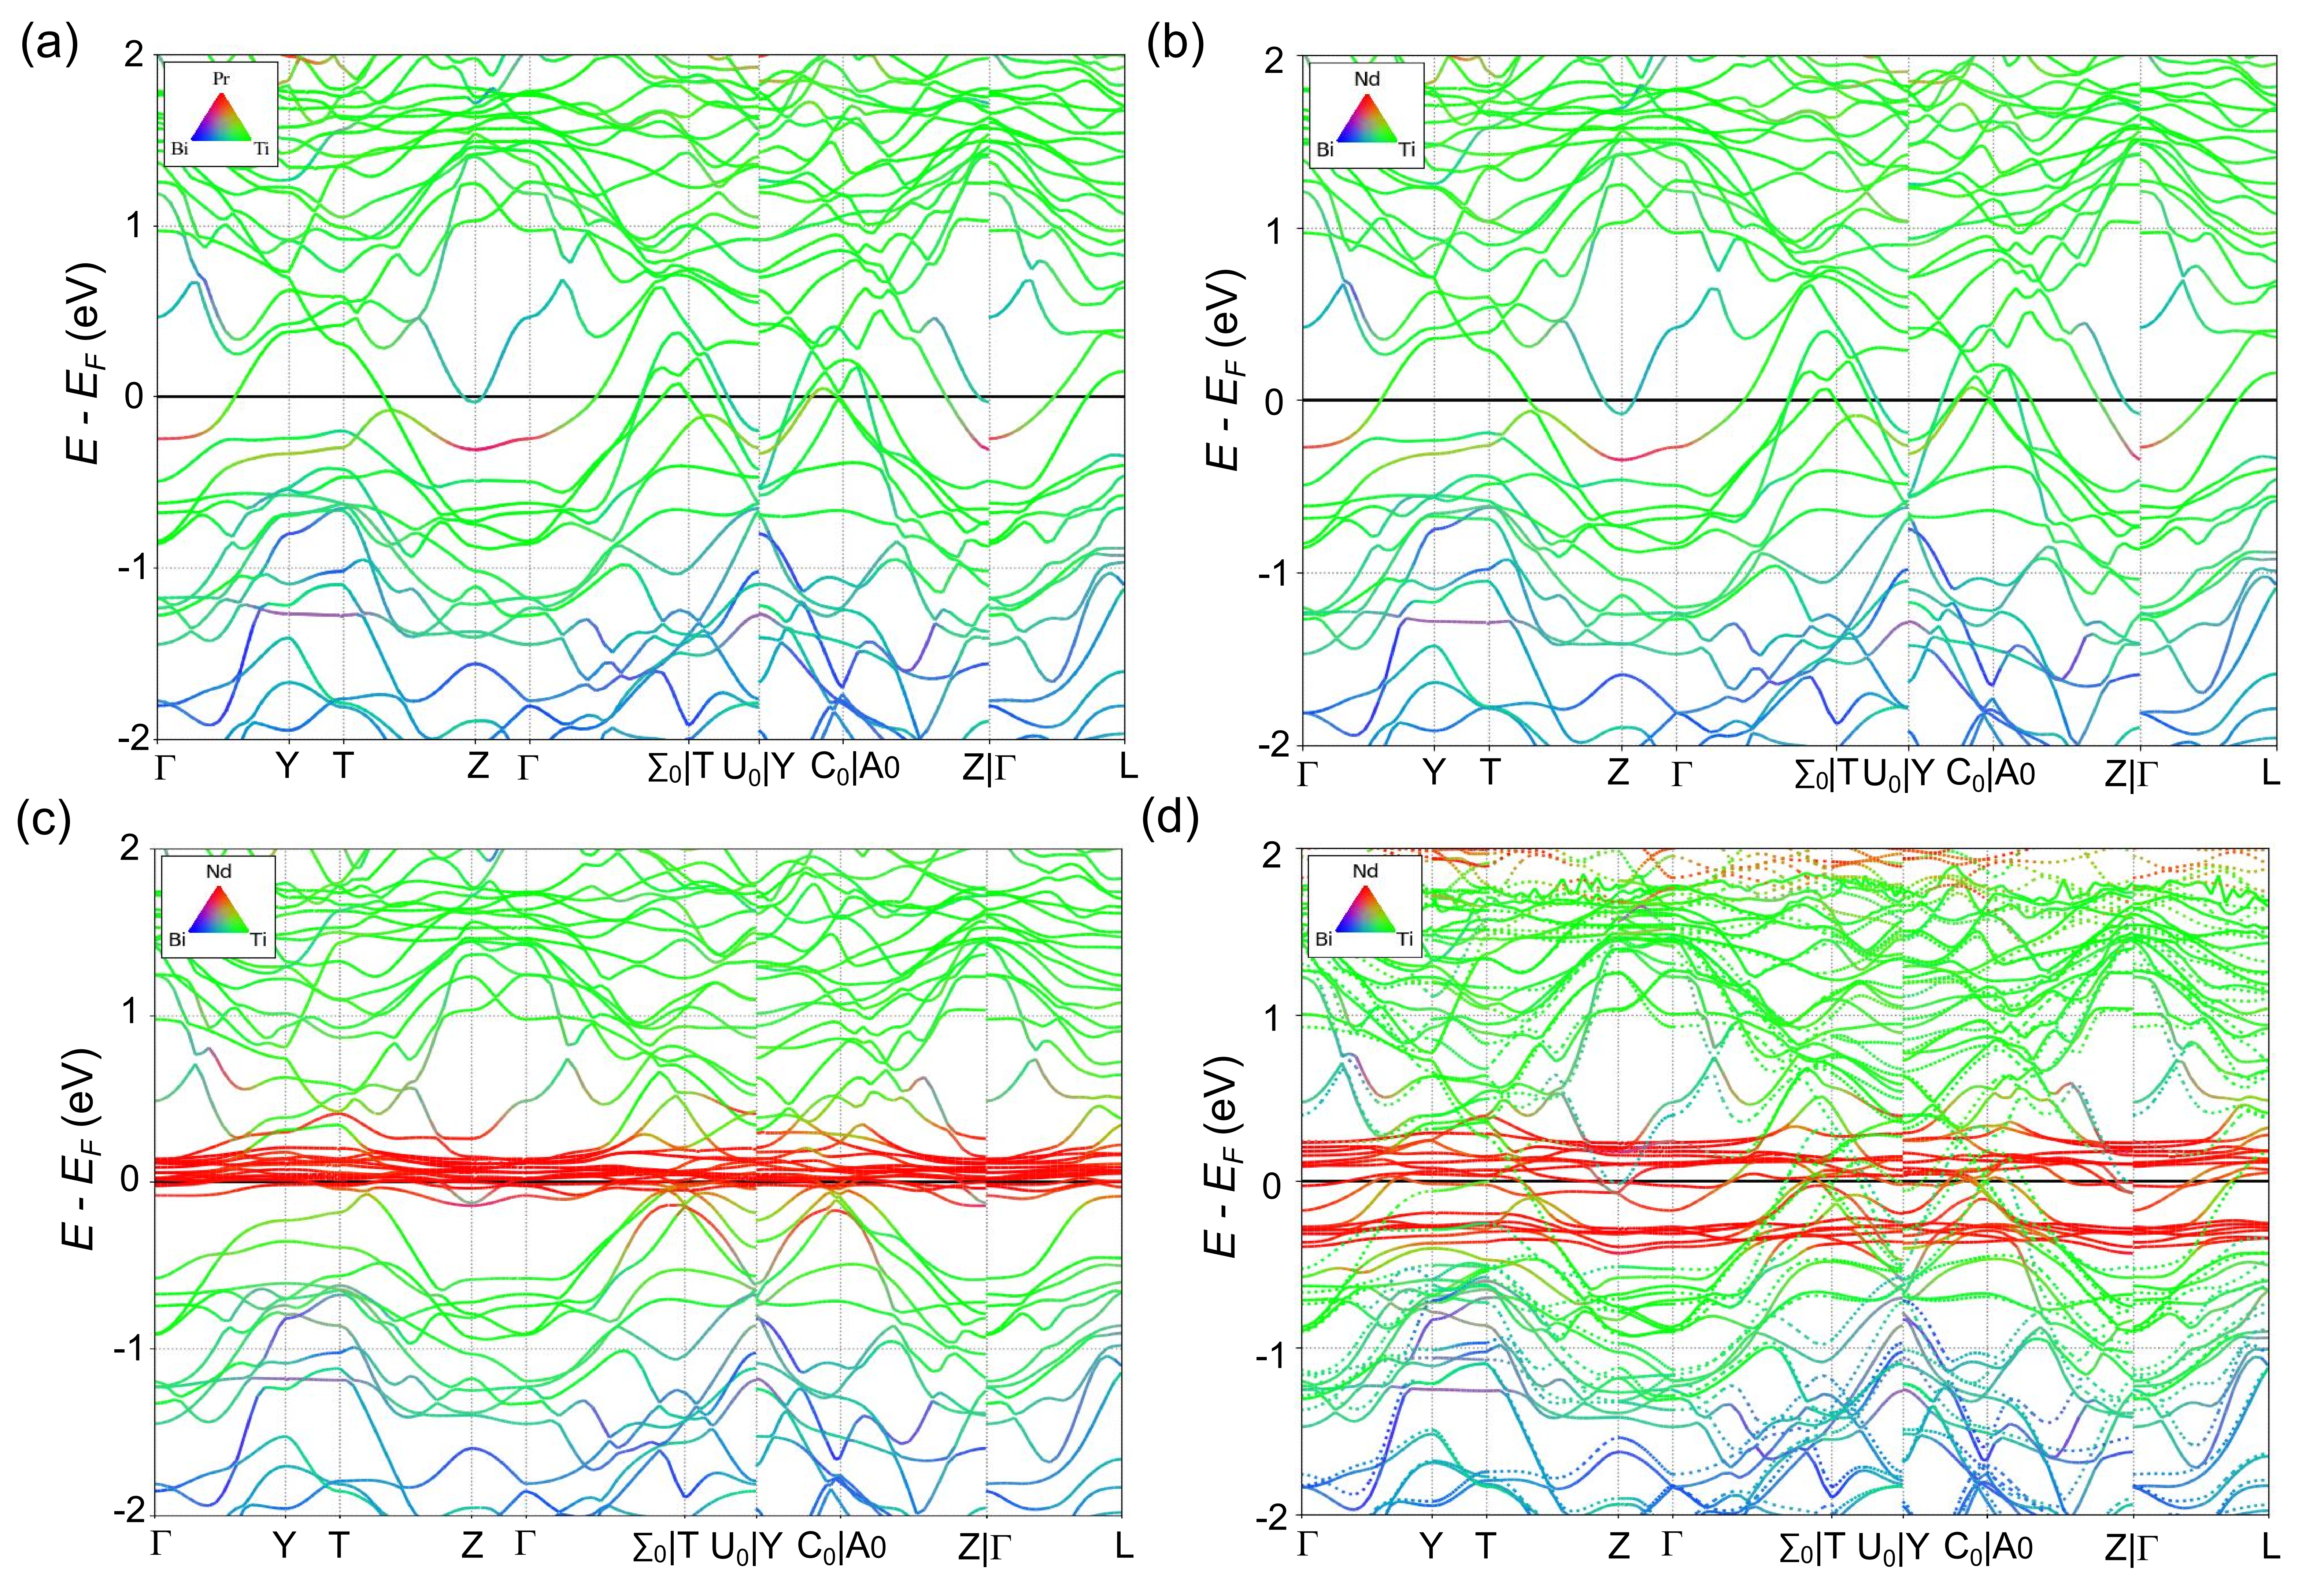


**Figure S6.** Electronic structure of (a) PrTi3Bi4 and (b) NdTi3Bi4. The bands with different color represent the contribution coming from Pr or Nd (red), Ti (green), and Bi (blue).

First principles calculations were carried out with the projector augmented wave method as implemented in the Vienna *ab initio* simulation package [1-3]. The generalized gradient approximation [4] of the Perdew-Burke-Ernzerhof [2] type was adopted for the exchange-correlation function. The cutoff energy of the plane-wave basis was 500 eV and the energy convergence standard was set to 10-8 eV. The 3 × 11 × 4 Monkhorst-Pack K-point mesh was employed for the Brillouin zone sampling of the 1 × 1 × 1 unit cell. Since Bi is a quite heavy element, spin-orbit coupling effect was taken into account by treating core electrons in fully relativistic method and valance electrons in second-variation method.

**
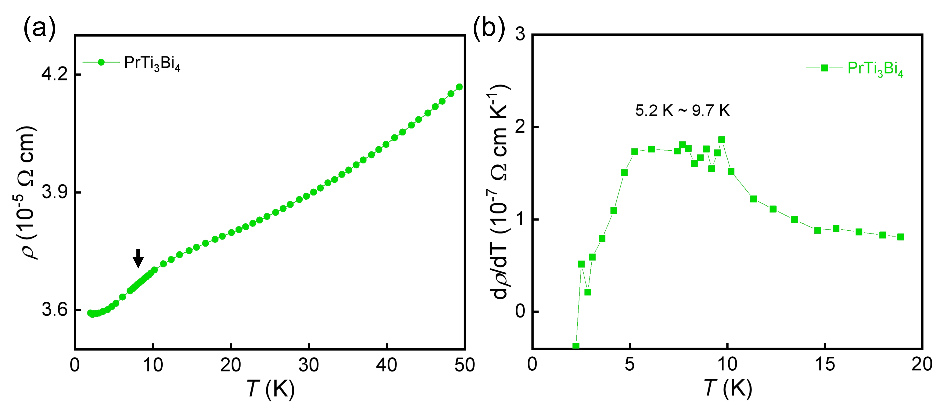
**

**Figure S7.** (a) Zoomed temperature-dependent resistivity of PrTi3Bi4 at low temperature. The arrow denotes the abnormal enhancement around 10 K. (b) First derivate of resistivity at low temperature.

**
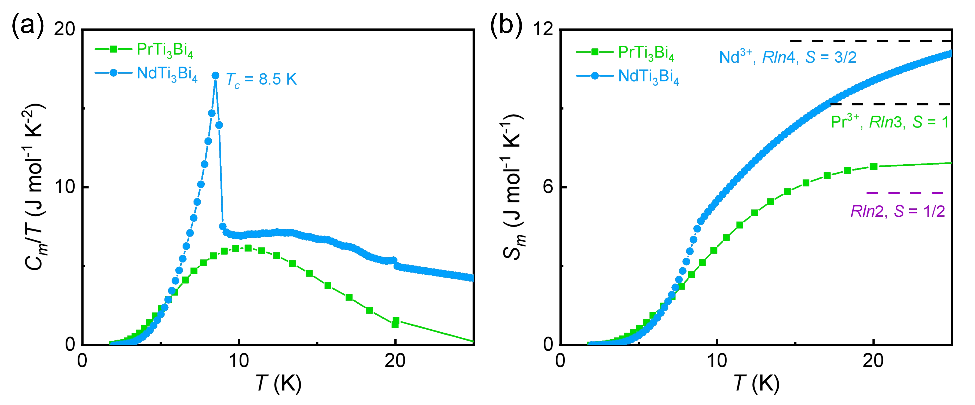
**

**Figure S8.** (a) *Cmag*/*T* *vs* *T* and (b) calculated magnetic entropy *Smag* of PrTi3Bi4 and NdTi3Bi4 single crystal. The dashed lines show the theoretical value *Rln*(2*S* + 1) with *S* = 1/2, 1, and 3/2.

To obtain the specific heat capacity contributed by magnon (*Cmag*) associated with the broad anomaly of PrTi3Bi4 and FM phase transition of NdTi3Bi4, the specific heat capacity of nonmagnetic YbTi3Bi4 is taken as the sum of phonon contribution (*Cph*) and electron contribution (*Ce*), *C*Yb= *Cph* + *Ce*. By subtracting the specific heat capacity of YbTi3Bi4 from the total specific heat capacity (*Cp*) of PrTi3Bi4 and NdTi3Bi4, the specific heat capacity contributed by magnon is calculated using *Cmag* = *Cp* - *C*Yb = *Cp* - *Cph* - *Ce*. The magnetic entropy is further calculated following. For PrTi3Bi4, the specific heat capacity contributed by magnon show a broad peak around 10 K. The magnetic entropy tends to saturated at 25 K and exceeds *Rln*2 = 5.78 J mol-1 K-1 with *S* = 1/2, possibly indicating a Pr3+ state with *S* = 1. For NdTi3Bi4, a sharp peak at 8.5 K can be observed in its specific heat capacity being contributed by magnon and the saturated magnetic entropy approaches the theoretical value *Rln*(2*S*+1) = 11.56 J mol-1 K-1 for *S* = 3/2, suggesting a Nd3+ state.

**
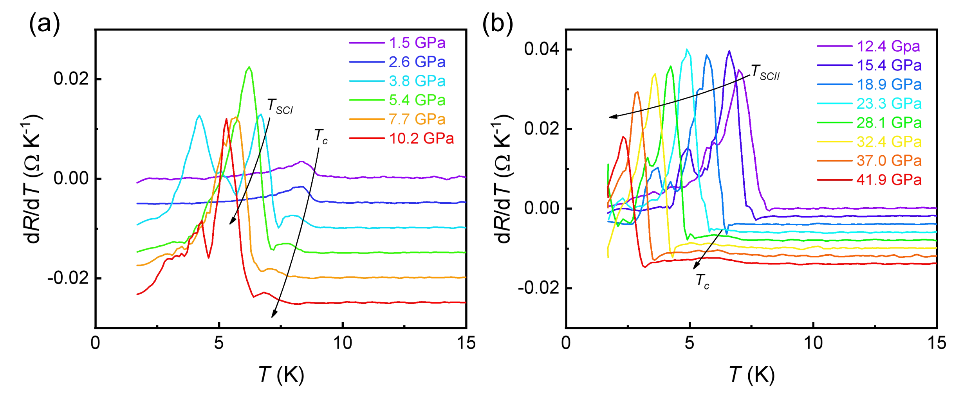
**

**Figure S9.** The first derivative curves of resistance (d*R*/d*T*) for NdTi3Bi4 under pressure ranging from (a)1.5 GPa to 10.2 GPa and (b) 12.4 GPa to 41.9 GPa. The arrows show the suppression trend of ferromagnetic ordering temperature (*Tc*) and superconducting transition temperature (*TSCI* or *TSCII*).

**
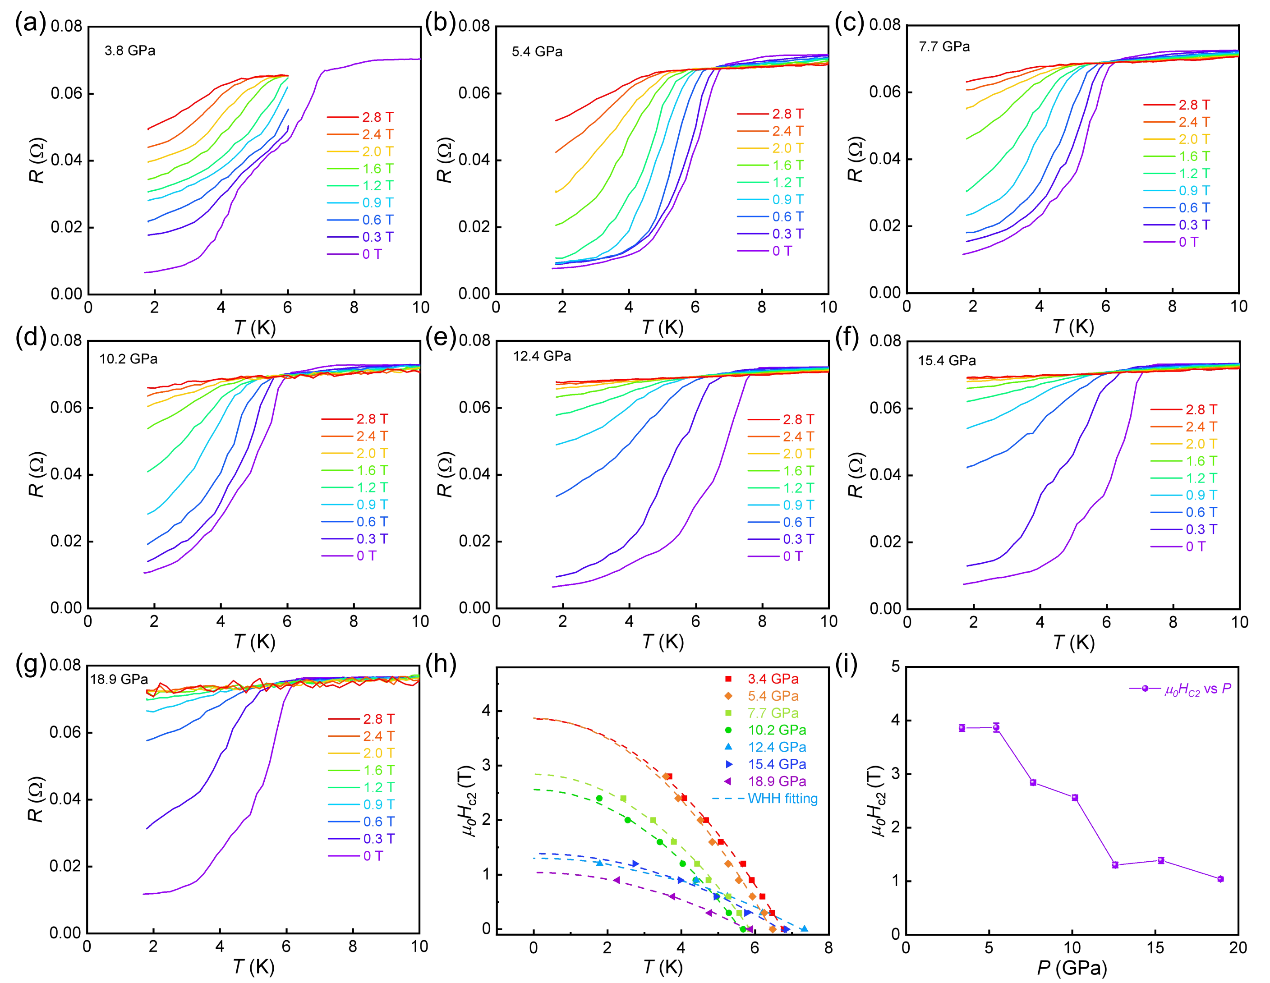
**

**Figure S10.** Resistance under different magnetic field for NdTi3Bi4 under (a) 3.8 GPa, (b) 5.4 GPa, (c) 7.7 GPa, (d) 10.2 GPa, (e) 12.4 GPa, (f) 15.4 GPa, and (g) 18.9 GPa. (h) Plots of superconducting transition temperature (*TSC*) vs upper critical field (*μ0Hc2*) for NdTi3Bi4 under different pressure. The dashed lines represent the WHH fittings to the data of *μ0Hc2*. (i) Pressure dependence of upper critical field for NdTi3Bi4.

Owing to the non-zero resistance, the pressure-induced superconducting transition may not be the intrinsic properties of NdTi3Bi4. To determine this issue, the resistance under different magnetic field (0 T - 2.8 T) have been measured. As shown in Figure S10a-g, the drop in resistance is suppressed with applied magnetic field. Under 3.8 GPa, without magnetic field, the superconducting transition shows a step-like feature with *T*SC1 = 4.2 K and *T*SC2 = 6.3 K, which are quite close to the reported pressure-induced superconducting transition of Bi-II (*T*SC = 3.92 K) and Bi-III (*T*SC = 7 K) under 2.8 GPa [5], respectively. A small magnetic field (< 0.3 T) would fully suppress the lower superconducting transition, but the higher superconducting transition would survive beyond 2.8 T. According to the Werthamer–Helfand–Hohenberg (WHH) theory [6], the upper critical field of the higher superconducting transition under 3.8 GPa is calculated to be 3.8 T, quite close to the reported upper critical field (3.71 T) of Bi-III phase [5]. For the pressure ranging from 5.4 GPa to 10.2 GPa, there only exists one superconducting transition, where both the superconducting transition temperature *T*SC and upper critical field slightly decrease with increasing pressure (Figure S10i), similar to the reported behavior of Bi-III phase [5]. When the pressure further increases to 12.4 GPa, another superconducting transition with higher *T*SC and lower upper critical field appears, which should be attributed to the reported Bi-V phase under high pressure [5].

[1] G. Kresse, J. Hafner, Abinitio molecular-dynamics for liquid-metals, Phys. Rev. B, 47 (1993) 558-561.

[2] G. Kresse, J. Furthmuller, Efficiency of ab-initio total energy calculations for metals and semiconductors using a plane-wave basis set, Comp. Mater. Sci., 6 (1996) 15-50.

[3] G. Kresse, J. Furthmuller, Efficient iterative schemes for ab initio total-energy calculations using a plane-wave basis set, Phys. Rev. B, 54 (1996) 11169-11186.

[4] J.P. Perdew, K. Burke, M. Ernzerhof, Generalized gradient approximation made simple, Phys. Rev. Lett., 78 (1997) 1396.

[5] Y. Li, E. Wang, X. Zhu, H.-H. Wen, Pressure-induced superconductivity in Bi single crystals, Phys. Rev. B, 95 (2017) 024510.

[6] N.R. Werthamer, E. Helfand, P.C. Hohenberg, Temperature and purity dependence of the superconducting critical field, Hc2. III. Electron spin and spin-orbit effects, Phys. Rev., 147 (1966) 295-302.
